# Supplementary material for: Chromosomal aberrations, cell suppression and oxidative stress generation induced by metal oxide nanoparticles in onion (Allium cepa) bulb
Source: Royal Society of Chemistry journal article supplement (doi:10.1039/c8mt00093j), 2018-01-01
Supplement: c8mt00093j1.pdf [file c8mt00093j1.pdf]

## Electronic Supplementary Information

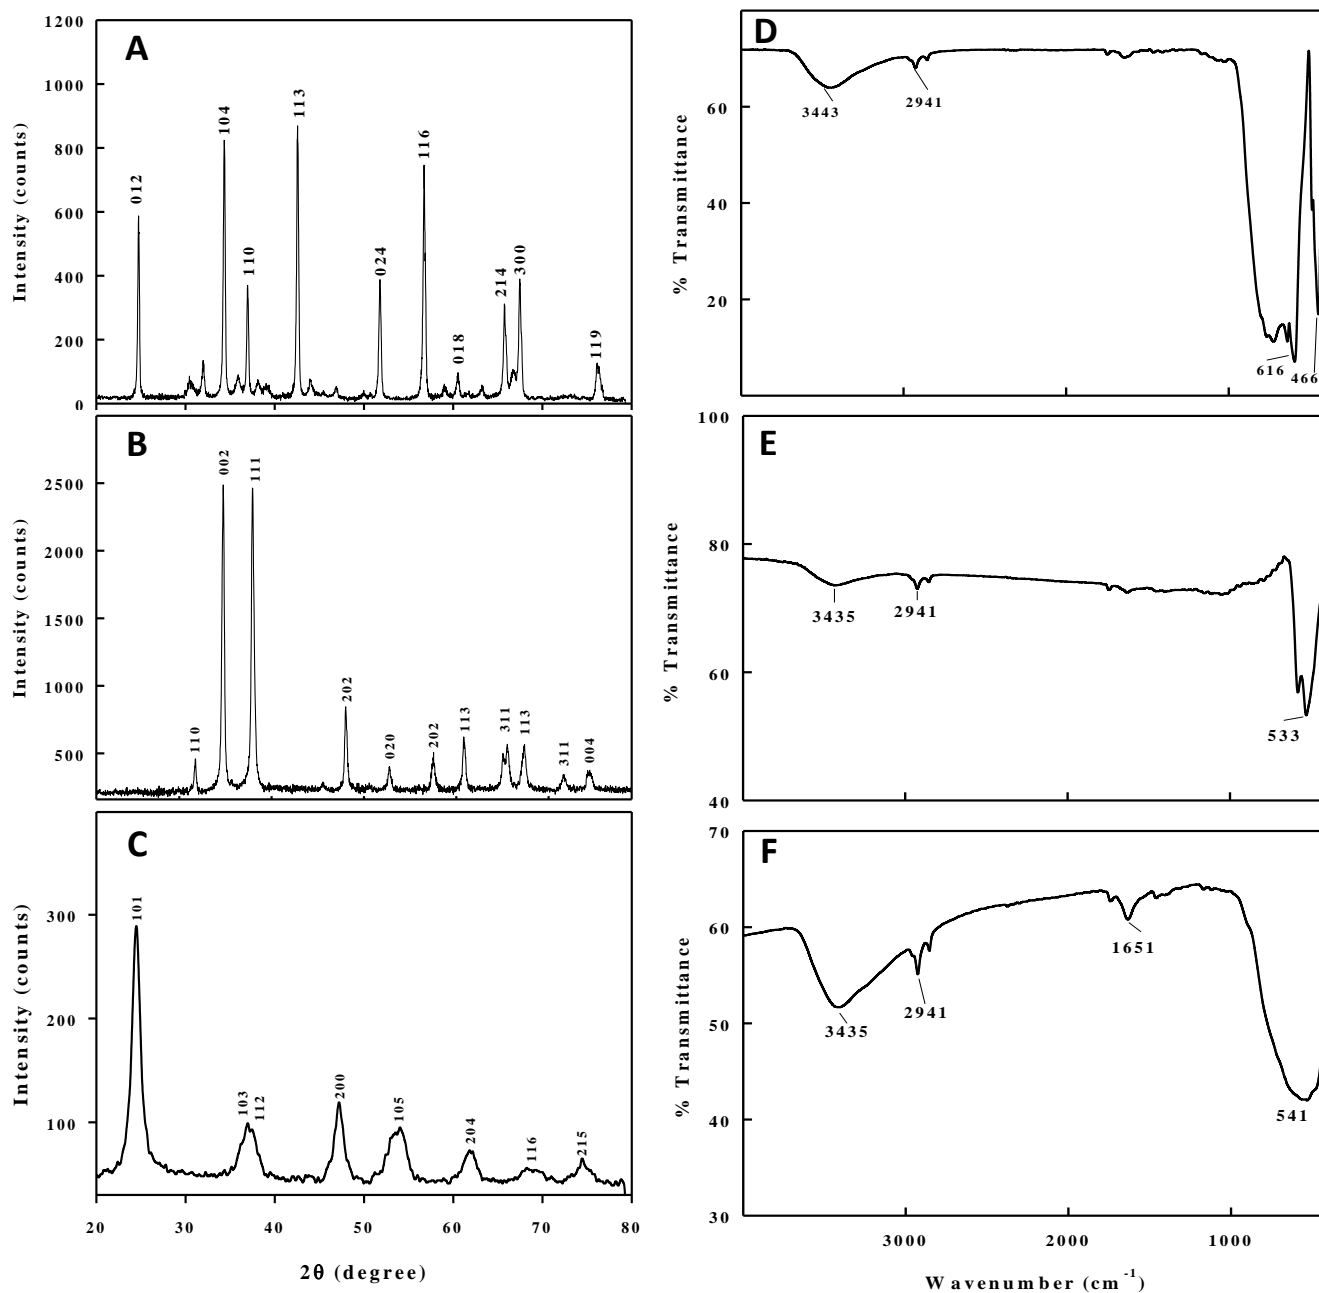

**Supplementary figure 1.** Characterization of Al<sub>2</sub>O<sub>3</sub>-NPs, CuO-NPs, and TiO<sub>2</sub>-NPs determined by XRD (A-C) and FTIR (D-E).

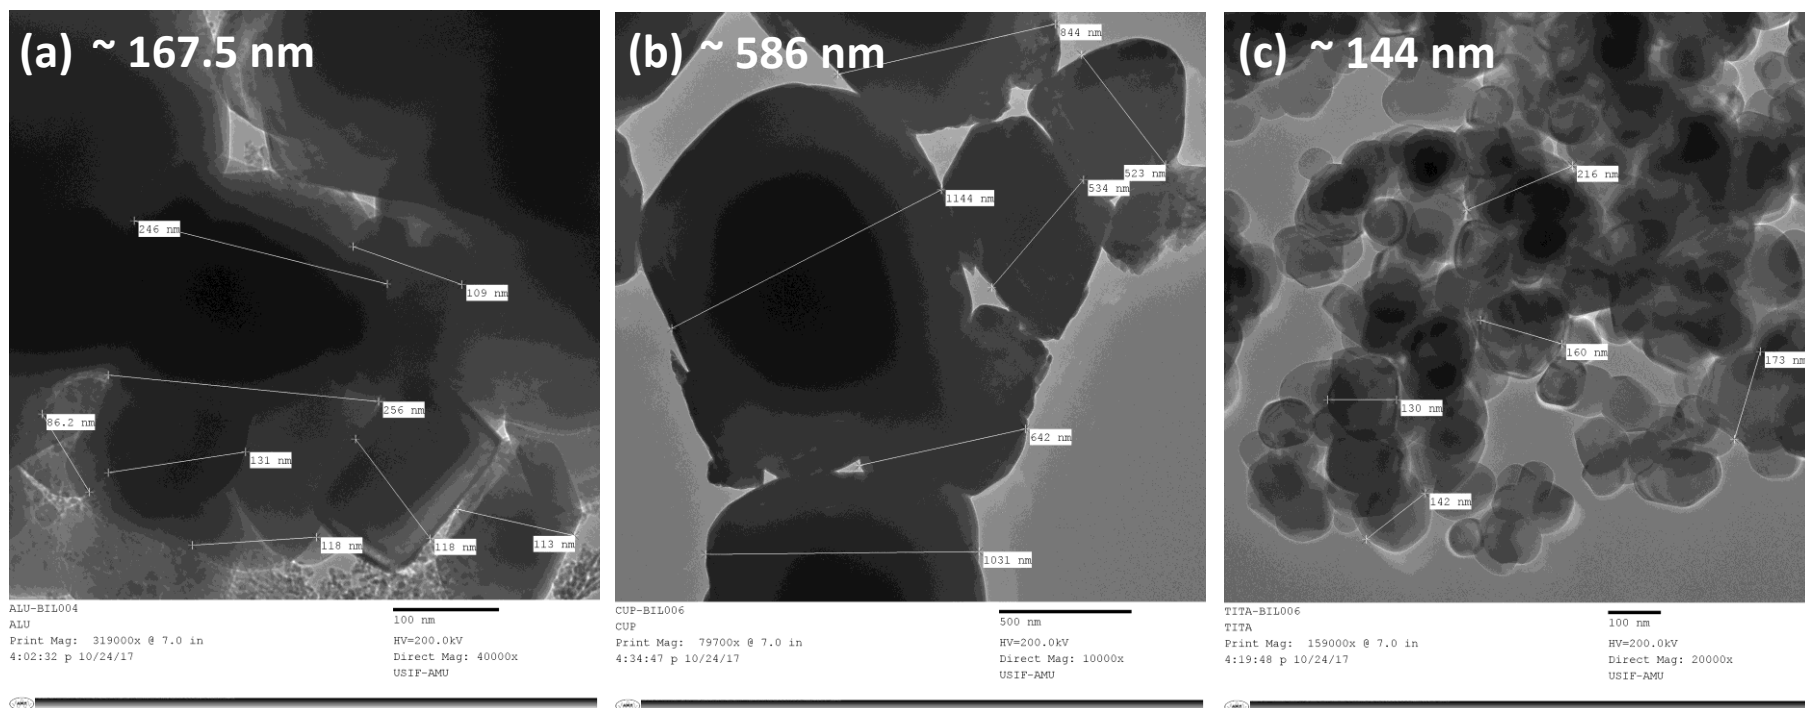

**Supplementary figure 2.** TEM micrographs of Al<sub>2</sub>O<sub>3</sub>-bulk (a), CuO-bulk (b), and TiO<sub>2</sub>-bulk (c) showing average diameter.

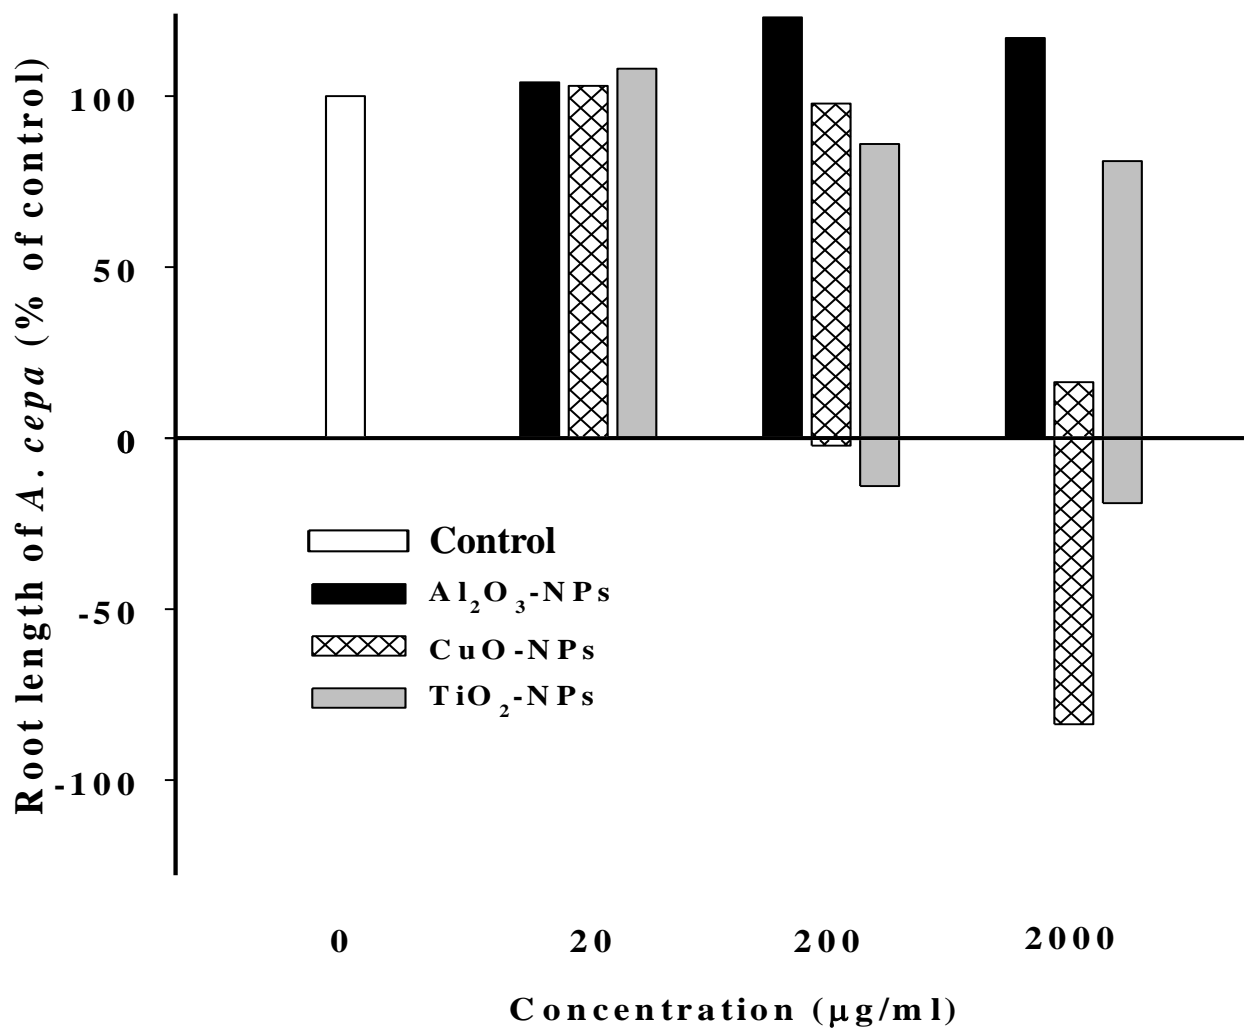

**Supplementary figure 3.** Percent change in root length of *A. cepa* under Al<sub>2</sub>O<sub>3</sub>-NPs, CuO-NPs, and TiO<sub>2</sub>-NPs stress. Histogram shows % change in root length as a function of NPs concentration taking separate untreated controls as 100 %, under each treatment condition.

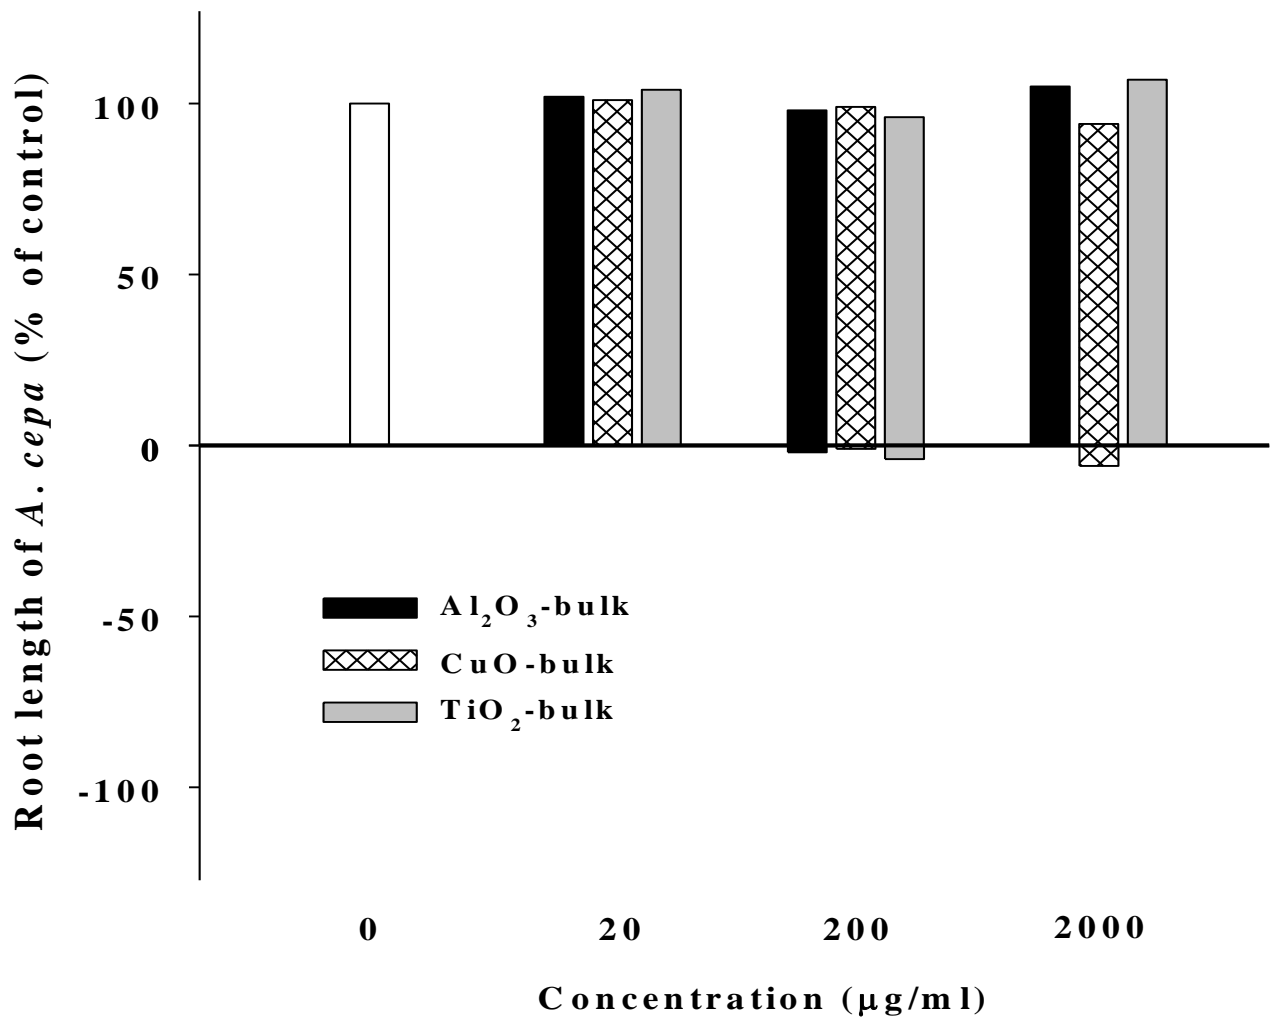

**Supplementary figure 4.** Percent change in root length of *A. cepa* under Al<sub>2</sub>O<sub>3</sub>-bulk, CuO-bulk, and TiO<sub>2</sub>-bulk stress. Histogram shows % change in root length as a function of NPs concentration taking separate untreated controls as 100 %, under each treatment condition.

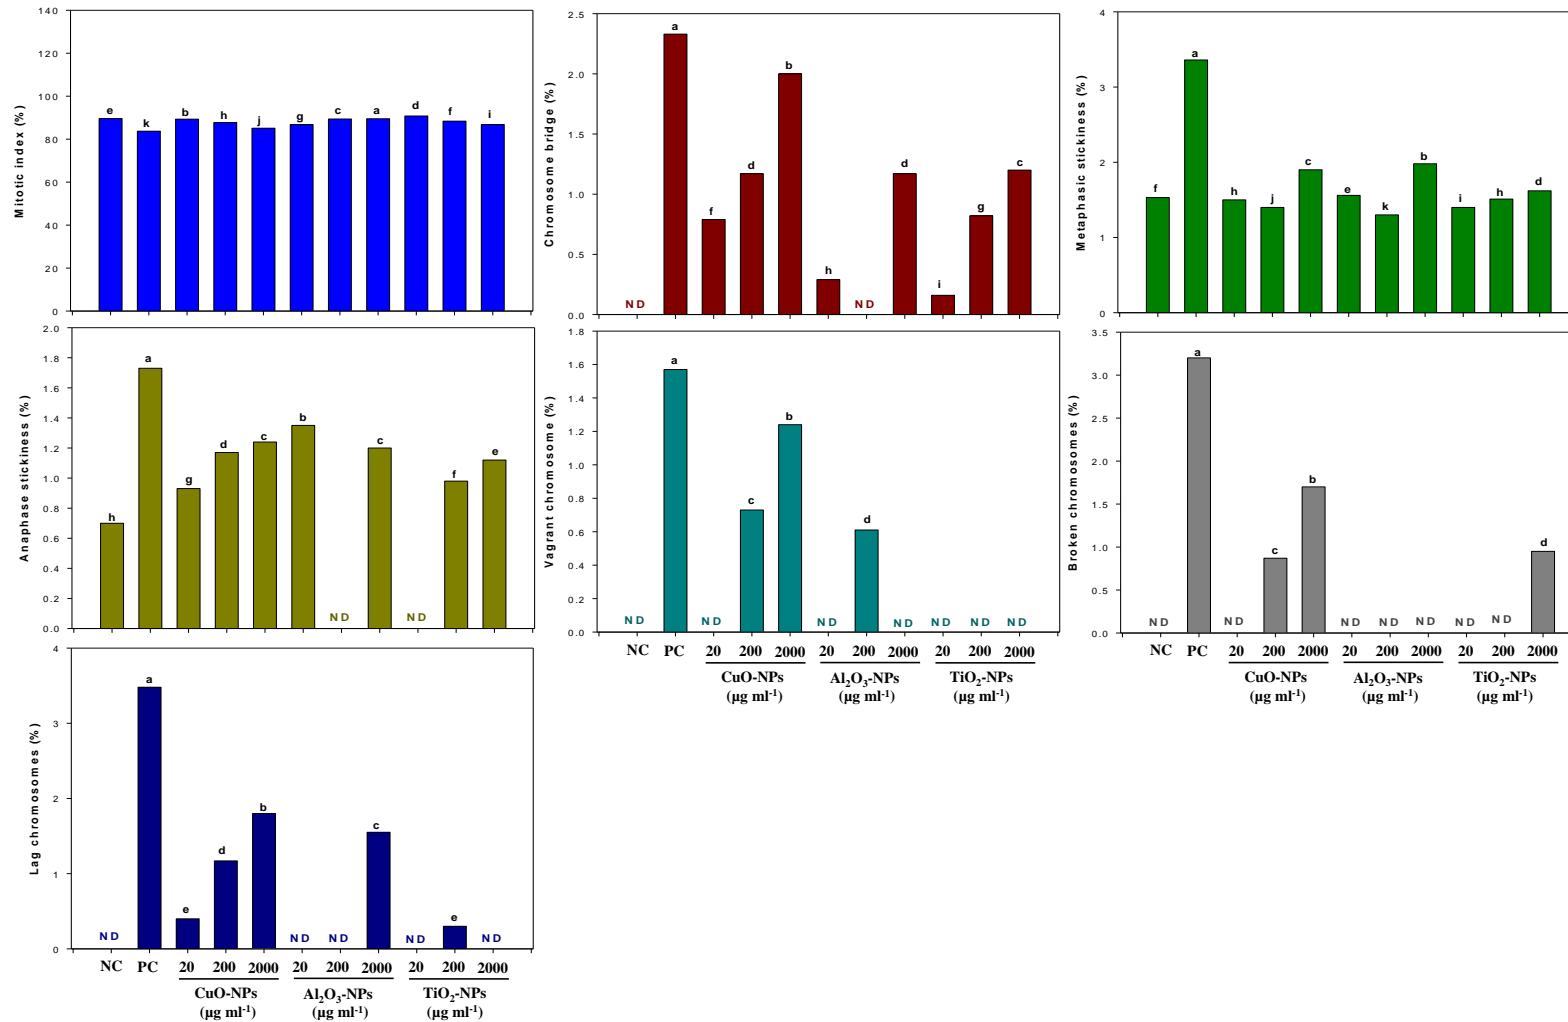

**Supplementary figure 5.** Graphical presentation of percent change in mitotic index and various chromosomal aberrations induced by Al<sub>2</sub>O<sub>3</sub>, CuO-NPs, TiO<sub>2</sub> and EMS (10 mM) in *A. cepa* root meristem cells at different cell division stages. Values are mean of three independent replicates. Mean values followed by different letters are significantly different within a column at P≤0.05 according to Duncan's multiple range test (DMRT). NC, PC, and ND represent 'negative control', 'positive control', and 'not detected', respectively.

Supplementary Table 1: Dissolution of Al, Cu, and Ti metals ions from their nano-form in aqueous media.

| Exposure concentration of NPs ( $\mu\text{g ml}^{-1}$ ) | Metal ions released from NPs in $\frac{1}{2}$ strength Hoagland's solution ( $\mu\text{g ml}^{-1}$ ) |                 |                     |
|---------------------------------------------------------|------------------------------------------------------------------------------------------------------|-----------------|---------------------|
|                                                         | $\text{Al}_2\text{O}_3$ -NPs                                                                         | CuO-NPs         | $\text{TiO}_2$ -NPs |
| 20                                                      | 0.11 $\pm$ 0.02                                                                                      | 0.14 $\pm$ 0.03 | 0.08 $\pm$ 0.02     |
| 200                                                     | 1.2 $\pm$ 0.14                                                                                       | 1.6 $\pm$ 0.08  | 2.1 $\pm$ 0.10      |
| 2000                                                    | 1.5 $\pm$ 0.09                                                                                       | 2.1 $\pm$ 0.21  | 3.2 $\pm$ 0.25      |
